# Supplementary material for: Differential Peripheral Blood Glycoprotein Profiles in Symptomatic and Asymptomatic COVID-19
Source: MDPI journal article supplement (doi:10.3390/v14030553), 2022-03-07
Supplement: s1 [file s1]

Supplementary Materials

# Differential Peripheral Blood Glycoprotein Profiles in Symptomatic and Asymptomatic COVID-19

**Table S2.** Detailed description of glycoprotein biomarkers used in LASSO-regularized classifier.

| Biomarker             | Protein                     | Glycosylation site | Glycan structure | Glycan figure                                                                         |
|-----------------------|-----------------------------|--------------------|------------------|---------------------------------------------------------------------------------------|
| A1AT.GP001_271_6503   | Alpha-1-antitrypsin         | 271                | 6503             | 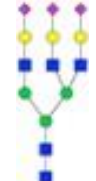   |
| A1AT.GP001_271MC_5412 | Alpha-1-antitrypsin         | 271MC              | 5412             |   |
| A2MG.GP004_991_5402   | Alpha-2-macroglobulin       | 991                | 5402             |  |
| AACT.GP005_271_6502   | Alpha-1-antichymotrypsin    | 271                | 6502             |                                                                                       |
| AACT.GP005_271_6503   | Alpha-1-antichymotrypsin    | 271                | 6503             |                                                                                       |
| AGP1.GP007_93_7614    | Alpha-1-acid glycoprotein 1 | 93                 | 7614             |  |
| ANGT.GP009_47_5401    | Angiotensinogen             | 47                 | 5401             |  |

|                                 |                              |     |      |                                                                                       |
|---------------------------------|------------------------------|-----|------|---------------------------------------------------------------------------------------|
| <b>CFAH.GP024_882_5411</b>      | Complement Factor H          | 882 | 5411 | 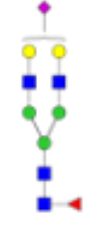   |
| <b>CFAH.GP024_882_5420.5401</b> | Complement Factor H          | 882 | 5401 |    |
| <b>HEMO.GP042_64_5401</b>       | Hemopexin                    | 64  | 5401 |    |
| <b>HPT.GP044_184_6411</b>       | Haptoglobin                  | 184 | 6411 |  |
| <b>HPT.GP044_241_5411</b>       | Haptoglobin                  | 241 | 5411 |  |
| <b>HRG.GP045_125_5420.5401</b>  | Histidine-rich glycoprotein  | 125 | 5401 |  |
| <b>IC1.GP077_253_6513</b>       | Plasma protease C1 inhibitor | 253 | 6513 |  |

|                                   |                                              |       |               |                                                                                     |
|-----------------------------------|----------------------------------------------|-------|---------------|-------------------------------------------------------------------------------------|
| ITIH1.GP054_285_5402              | Inter-alpha-trypsin inhibitor heavy chain H1 | 285   | 5402          |  |
| QUANTPEP.ANT3.GP010_FATTFYQHLADSK | Antithrombin-III                             | PEP   | FATTFYQHLADSK | N/A                                                                                 |
| QUANTPEP.PON1.GP060_YVYIAELLAHK   | Serum paraoxonase/arylesterase 1             | PEP   | YVYIAELLAHK   | N/A                                                                                 |
| THRB.GP063_416MC_5401             | Prothrombin                                  | 416MC | 5401          |  |
