# Supplementary material for: Differential Peripheral Blood Glycoprotein Profiles in Symptomatic and Asymptomatic COVID-19
Source: MDPI journal article supplement (doi:10.3390/v14030553), 2022-03-07
Supplement: s1 [file s1]

| marker                        | FDR                            |                       |                              |                                    | Relative Abundance               |                                    |                                  |                               |                         |                |         |        |
|-------------------------------|--------------------------------|-----------------------|------------------------------|------------------------------------|----------------------------------|------------------------------------|----------------------------------|-------------------------------|-------------------------|----------------|---------|--------|
|                               | healthy vs. sympt.<br>COVID-19 | healthy vs.<br>sepsis | healthy<br>vs.common<br>cold | healthy vs.<br>asympt.<br>COVID-19 | sympt.<br>COVID-19 vs.<br>sepsis | sympt. COVID-19<br>vs. common cold | sympt.<br>vs.asympt.CO<br>VID-19 | Sympt.<br>COVID-19            | Asympt.<br>COVID-<br>19 | Common<br>cold | Healthy | Sepsis |
| A1AT.GP001_2<br>71_5402       | 0.00000842                     | 0.182                 | 0.829                        | 0.391                              | 0.0062                           | 0.000116                           | 0.0000000151                     | 46.53024348+I3:<br>N42II3:M69 | 17.8                    | 23.3           | 23.1    | 24.6   |
| A1AT.GP001_2<br>71_5412       | 0.000263                       | 0.0693                | 0.936                        | 0.518                              | 0.0327                           | 0.00123                            | 0.0000598                        | 0.569                         | 0.225                   | 0.193          | 0.221   | 0.284  |
| A1AT.GP001_2<br>71_6503       | 0.00715                        | 0.102                 | 0.0148                       | 0.0658                             | 0.00177                          | 0.000264                           | 0.00000714                       | 0.168                         | 0.0706                  | 0.0718         | 0.107   | 0.0844 |
| A1AT.GP001_2<br>71MC_5402     | 0.711                          | 0.00294               | 0.0229                       | 0.0306                             | 0.0175                           | 0.0671                             | 0.0385                           | 3.28                          | 1.81                    | 0.738          | 2.43    | 14.7   |
| A1AT.GP001_2<br>71MC_5412     | 0.0000119                      | 0.0262                | 0.00813                      | 0.625                              | 0.399                            | 0.00000172                         | 0.0000000659                     | 0.172                         | 0.074                   | 0.0408         | 0.0836  | 0.134  |
| A2MG.GP004_<br>991_5402       | 0.0154                         | 0.00921               | 0.000000509                  | 0.0136                             | 0.00000326                       | 0.011                              | 0.416                            | 0.222                         | 0.263                   | 0.106          | 0.383   | 0.611  |
| AACT.GP005_1<br>27_5401       | 0.66                           | 0.00249               | 0.413                        | 0.5                                | 0.000337                         | 0.205                              | 0.155                            | 0.0218                        | 0.021                   | 0.0199         | 0.0223  | 0.0456 |
| AACT.GP005_1<br>27_6502       | 0.0581                         | 0.000208              | 0.229                        | 0.012                              | 0.00834                          | 0.0193                             | 0.0000873                        | 0.0382                        | 0.0239                  | 0.0272         | 0.0318  | 0.0588 |
| AACT.GP005_2<br>71_6502       | 0.000919                       | 0.0229                | 0.000347                     | 0.0512                             | 0.286                            | 0.000153                           | 0.00000391                       | 0.497                         | 0.109                   | 0.0685         | 0.21    | 0.262  |
| AACT.GP005_2<br>71_6503       | 0.196                          | 0.000323              | 0.00927                      | 0.0255                             | 0.000112                         | 0.000477                           | 0.0000974                        | 0.099                         | 0.0598                  | 0.0494         | 0.0839  | 0.0347 |
| AACT.GP005_2<br>71_6513       | 0.000000214                    | 0.0405                | 0.0141                       | 0.474                              | 0.00359                          | 0.0000000193                       | 0.00000000008<br>45              | 0.0731                        | 0.0256                  | 0.0175         | 0.0293  | 0.0423 |
| AGP1.GP007_9<br>3_7614        | 0.00000941                     | 0.018                 | 0.935                        | 0.729                              | 0.364                            | 0.0000987                          | 0.000000114                      | 2.86                          | 0.307                   | 0.254          | 0.323   | 1.36   |
| AGP12.GP007.0<br>08_72_6503   | 0.00166                        | 0.0676                | 0.637                        | 0.404                              | 0.000362                         | 0.00203                            | 0.000013                         | 9.86                          | 4.49                    | 4.86           | 5.45    | 3.05   |
| AGP12.GP007.0<br>08_72_6513   | 0.00251                        | 0.676                 | 0.694                        | 0.434                              | 0.0175                           | 0.0138                             | 0.000999                         | 0.112                         | 0.0513                  | 0.0443         | 0.0404  | 0.055  |
| AGP12.GP007.0<br>08_72MC_7601 | 0.52                           | 0.00317               | 0.838                        | 0.508                              | 0.00961                          | 0.444                              | 0.164                            | 0.356                         | 0.326                   | 0.292          | 0.346   | 0.844  |
| AGP12.GP007.0<br>08_72MC_7602 | 0.019                          | 0.0000558             | 0.0235                       | 0.0818                             | 0.0439                           | 0.000385                           | 0.0000218                        | 4.32                          | 2.26                    | 1.62           | 2.7     | 6.38   |
| ANGT.GP009_<br>47_5401        | 0.000000112                    | 0.25                  | 0.309                        | 0.822                              | 0.000751                         | 0.00293                            | 0.00000365                       | 0.0472                        | 0.127                   | 0.097          | 0.18    | 0.125  |

|                              |                |             |          |         |         |              |             |         |         |         |         |         |
|------------------------------|----------------|-------------|----------|---------|---------|--------------|-------------|---------|---------|---------|---------|---------|
| APOB.GP013_9<br>83_5401      | 0.000347       | 0.419       | 0.0419   | 0.217   | 0.0439  | 0.0000000888 | 0.00853     | 0.0959  | 0.142   | 0.22    | 0.164   | 0.135   |
| APOD.GP014_9<br>8_5412       | 0.0000237      | 0.00000156  | 0.00244  | 0.0878  | 0.00574 | 0.939        | 0.00478     | 0.0115  | 0.0166  | 0.0132  | 0.0215  | 0.00647 |
| APOH.GP015_253_5401          | 0.000000000137 | 0.00699     | 0.00825  | 0.0413  | 0.0283  | 0.0143       | 2.7E-09     | 0.233   | 0.693   | 0.424   | 1.33    | 0.44    |
| CAN3.GP022_3<br>66_6503      | 0.00302        | 0.682       | 0.0137   | 0.475   | 0.0443  | 0.0000197    | 0.0000209   | 0.0473  | 0.0311  | 0.0234  | 0.032   | 0.0334  |
| CERU.GP023_1<br>38_5412      | 0.000245       | 0.282       | 0.171    | 0.79    | 0.0299  | 0.0349       | 0.00000245  | 0.652   | 0.345   | 0.409   | 0.319   | 0.427   |
| CERU.GP023_7<br>62_6523      | 0.00128        | 0.542       | 0.368    | 0.57    | 0.028   | 0.017        | 0.00252     | 0.0197  | 0.00966 | 0.0126  | 0.0106  | 0.0101  |
| CFAH.GP024_5<br>29_5402      | 0.0151         | 0.956       | 0.0166   | 0.101   | 0.0413  | 0.00000572   | 0.000000958 | 0.0225  | 0.0134  | 0.0122  | 0.0185  | 0.0178  |
| CFAH.GP024_8<br>82_5411      | 0.00000566     | 0.124       | 0.00229  | 0.0835  | 0.0538  | 0.101        | 0.00929     | 0.00533 | 0.0069  | 0.00458 | 0.00758 | 0.0066  |
| CFAH.GP024_8<br>82_5420.5401 | 0.000000000016 | 0.00503     | 0.0233   | 0.179   | 0.0139  | 0.00114      | 6.36E-11    | 0.00894 | 0.019   | 0.0115  | 0.0229  | 0.0128  |
| CFAI.GP025_10<br>3_5402      | 0.00159        | 0.922       | 0.0139   | 0.022   | 0.0242  | 0.000000075  | 1.25E-10    | 0.0271  | 0.0171  | 0.0144  | 0.0197  | 0.0208  |
| CLUS.GP026_2<br>91_5402      | 0.00573        | 0.00000112  | 0.000215 | 0.022   | 0.0023  | 0.125        | 0.916       | 0.818   | 0.933   | 0.751   | 1.15    | 0.502   |
| CLUS.GP026_2<br>91_5421.5402 | 0.000245       | 0.000000332 | 0.000564 | 0.0183  | 0.0103  | 0.881        | 0.239       | 0.465   | 0.657   | 0.526   | 0.789   | 0.264   |
| CLUS.GP026_8<br>6_6503       | 0.0000436      | 0.000000479 | 0.124    | 0.0141  | 0.00378 | 0.0865       | 0.196       | 0.0113  | 0.0151  | 0.0147  | 0.02    | 0.00431 |
| CO2.GP027_62<br>1_6301       | 0.611          | 0.000713    | 0.137    | 0.0616  | 0.00898 | 0.108        | 0.0242      | 0.0444  | 0.021   | 0.0206  | 0.0345  | 0.116   |
| CO8B.GP034_2<br>43_6610      | 0.0000000964   | 0.000000332 | 0.0585   | 0.00192 | 0.0359  | 0.0158       | 0.177       | 0.716   | 1.06    | 1.23    | 2.07    | 0.334   |
| FETUA.GP036_346_1101         | 0.000000189    | 0.00000194  | 0.0025   | 0.146   | 0.02    | 0.373        | 0.0000187   | 5.92    | 9.82    | 6.93    | 10.2    | 3.2     |
| FETUA.GP036_346_1102         | 0.000467       | 0.00000197  | 0.00365  | 0.172   | 0.0188  | 0.924        | 0.0632      | 0.371   | 0.481   | 0.426   | 0.574   | 0.225   |
| HEMO.GP042_240.246_5402      | 0.000877       | 0.00000112  | 0.00486  | 0.0972  | 0.00032 | 0.428        | 0.246       | 0.0303  | 0.034   | 0.0269  | 0.0407  | 0.018   |
| HEMO.GP042_64_5401           | 2.07E-12       | 0.0418      | 0.0298   | 0.57    | 0.00861 | 0.0000639    | 2.77E-12    | 0.0373  | 0.0651  | 0.0526  | 0.0753  | 0.0518  |

|                              |                  |               |          |          |         |               |             |         |         |         |         |         |
|------------------------------|------------------|---------------|----------|----------|---------|---------------|-------------|---------|---------|---------|---------|---------|
| HPT.GP044_18<br>4_6411       | 2.96E-08         | 0.0146        | 0.144    | 0.813    | 0.00032 | 0.0000000618  | 2.81E-10    | 1.04    | 0.312   | 0.14    | 0.31    | 0.536   |
| HPT.GP044_24<br>1_5411       | 0.000205         | 0.932         | 0.112    | 0.00592  | 0.00177 | 0.13          | 0.871       | 0.03    | 0.0325  | 0.0412  | 0.0591  | 0.0614  |
| HPT.GP044_24<br>1_7602       | 0.0367           | 0.000207      | 0.215    | 0.367    | 0.0363  | 0.00503       | 0.000634    | 1.09    | 0.665   | 0.601   | 0.661   | 1.66    |
| HRG.GP045_12<br>5_5420.5401  | 1.35E-16         | 0.0000334     | 0.0727   | 0.0165   | 0.0557  | 0.00000000043 | 8.72E-10    | 0.0736  | 0.206   | 0.237   | 0.285   | 0.111   |
| IC1.GP077_253<br>_5412       | 0.000276         | 0.197         | 0.00379  | 0.0165   | 0.0252  | 0.00000172    | 2.84E-09    | 0.152   | 0.065   | 0.0534  | 0.0912  | 0.114   |
| IC1.GP077_253<br>6513        | 0.00789          | 0.203         | 0.000555 | 0.000788 | 0.00217 | 0.00000172    | 2.32E-09    | 0.0614  | 0.0299  | 0.0299  | 0.0448  | 0.0391  |
| IGG1.GP048_29<br>7_3410      | 0.0266           | 0.00519       | 0.0506   | 0.721    | 0.0413  | 0.00375       | 0.00293     | 27      | 14.8    | 11.1    | 15.7    | 36      |
| IGG1.GP048_29<br>7_3510      | 0.346            | 0.0343        | 0.00878  | 0.891    | 0.0432  | 0.00892       | 0.212       | 4.94    | 3.72    | 2.53    | 4.13    | 6.51    |
| IGG2.GP049_29<br>7_4310      | 0.000586         | 0.0000513     | 0.0193   | 0.0151   | 0.0357  | 0.911         | 0.912       | 0.0387  | 0.0391  | 0.0419  | 0.0651  | 0.0268  |
| IGG2.GP049_29<br>7_4400      | 0.000378         | 0.00000543    | 0.00472  | 0.0357   | 0.0359  | 0.826         | 0.421       | 0.141   | 0.2     | 0.139   | 0.305   | 0.0776  |
| IGG2.GP049_29<br>7_4410      | 0.000000913      | 0.00000364    | 0.000944 | 0.00864  | 0.0175  | 0.533         | 0.278       | 8.89    | 11.2    | 8.61    | 21.1    | 4.41    |
| IGG2.GP049_29<br>7_4411      | 0.000000194      | 0.00000112    | 0.000419 | 0.00246  | 0.0246  | 0.569         | 0.407       | 1.98    | 2.15    | 1.51    | 4.12    | 0.861   |
| IGG2.GP049_29<br>7_4511      | 0.0000000313     | 0.00000000728 | 0.00109  | 0.00147  | 0.0269  | 0.475         | 0.27        | 0.00595 | 0.00754 | 0.00675 | 0.0155  | 0.00302 |
| IGG2.GP049_29<br>7_5410      | 0.00000000000553 | 0.0000000332  | 0.00176  | 0.00246  | 0.0107  | 0.023         | 0.00133     | 3.92    | 7.53    | 6.09    | 17.2    | 1.34    |
| IGG2.GP049_29<br>7_5411      | 0.000000000194   | 0.0000000571  | 0.0117   | 0.00166  | 0.0258  | 0.057         | 0.0858      | 2.02    | 3.03    | 3.13    | 6.78    | 0.769   |
| IGG2.GP049_29<br>7_5510      | 0.000000000363   | 0.0000000363  | 0.0126   | 0.0168   | 0.0297  | 0.0184        | 0.00249     | 0.18    | 0.38    | 0.372   | 0.87    | 0.116   |
| ITI1.GP054_2<br>85_5402      | 0.00000864       | 0.0145        | 0.695    | 0.559    | 0.0331  | 0.000067      | 0.000000507 | 0.0227  | 0.00558 | 0.0052  | 0.00576 | 0.0118  |
| ITI1.GP054_2<br>85_5402.5421 | 0.00000000763    | 0.00000501    | 0.76     | 0.079    | 0.0235  | 0.0000000798  | 0.0000471   | 0.045   | 0.0599  | 0.0739  | 0.07    | 0.0365  |
| ITI1.GP054_2<br>85_5511      | 0.0000000585     | 0.0000095     | 0.00676  | 0.0107   | 0.0139  | 0.713         | 0.405       | 0.00948 | 0.0101  | 0.00936 | 0.0148  | 0.00753 |

|                                                       |                 |             |           |          |                     |             |                         |         |         |         |         |         |
|-------------------------------------------------------|-----------------|-------------|-----------|----------|---------------------|-------------|-------------------------|---------|---------|---------|---------|---------|
| ITI11.GP054_5<br>88_5402                              | 0.291           | 0.000624    | 0.000141  | 0.578    | 0.00995             | 0.0000241   | 0.7                     | 0.00834 | 0.00807 | 0.00407 | 0.00937 | 0.00543 |
| ITI11.GP054_6<br>53_1101                              | 0.00000000167   | 0.00000202  | 0.047     | 0.058    | 0.0107              | 0.000138    | 0.00000311              | 0.371   | 0.571   | 0.549   | 0.658   | 0.28    |
| KLKB1.GP056_<br>396_5402                              | 0.000593        | 0.000995    | 0.418     | 0.0962   | 0.0413              | 0.0217      | 0.279                   | 0.175   | 0.187   | 0.22    | 0.216   | 0.134   |
| KLKB1.GP056_<br>453_5402                              | 0.00158         | 0.000512    | 0.295     | 0.248    | 0.0323              | 0.139       | 0.0844                  | 0.134   | 0.154   | 0.157   | 0.179   | 0.101   |
| KLKB1.GP056_<br>494_5401                              | 0.815           | 0.0483      | 0.204     | 0.204    | 0.0175              | 0.269       | 0.231                   | 0.00117 | 0.00103 | 0.00112 | 0.00124 | 0.0026  |
| KNG1.GP057_6<br>28_1102                               | 0.0000105       | 0.0000284   | 0.0125    | 0.0263   | 0.0175              | 0.826       | 0.4                     | 0.291   | 0.291   | 0.27    | 0.417   | 0.184   |
| QUANTPEP.A<br>2GL.GP003_DL<br>LLPQPDLR                | 0.000000378     | 0.000000782 | 0.0286    | 0.0427   | 0.00861             | 0.000000351 | 0.00000000005<br>3      | 3.9     | 1.1     | 1.01    | 1.42    | 6.46    |
| QUANTPEP.A<br>NT3.GP010_FA<br>TTFYQHLADS<br>K         | 0.0000000000102 | 0.00000141  | 0.00264   | 0.000212 | 0.515               | 0.00175     | 0.0845                  | 0.0556  | 0.066   | 0.08    | 0.126   | 0.0515  |
| QUANTPEP.A<br>POA1.GP011_D<br>LATVYVDVLK              | 0.0000131       | 0.000000806 | 0.422     | 0.696    | 0.000883            | 0.000951    | 0.00000125              | 24.8    | 47.6    | 43      | 49      | 12      |
| QUANTPEP.C<br>LUS.GP026_AS<br>SIIDELFQDR              | 0.0061          | 0.000000575 | 0.000149  | 0.0178   | 0.00154             | 0.0839      | 0.99                    | 1.56    | 1.71    | 1.34    | 2.09    | 0.964   |
| QUANTPEP.K<br>NG1.GP057_YF<br>IDFVAR                  | 0.0000000126    | 0.00000288  | 0.0000879 | 0.0456   | 0.0269              | 0.0191      | 0.00106                 | 5.59    | 7.64    | 4.88    | 8.87    | 4.5     |
| QUANTPEP.P<br>ON1.GP060_Y<br>VYIAELLAHK               | 0.000000883     | 0.00461     | 0.583     | 0.578    | 0.919               | 0.0000356   | 0.000000232             | 0.241   | 0.378   | 0.352   | 0.355   | 0.251   |
| QUANTPEP.SE<br>PP1.GP061_VS<br>LATVDK                 | 0.00000931      | 0.000000332 | 0.021     | 0.0881   | 0.00133             | 0.112       | 0.002                   | 0.105   | 0.14    | 0.135   | 0.188   | 0.0627  |
| QUANTPEP.TT<br>R.GP065_TSES<br>GELHGLTTEE<br>EFVEGIYK | 0.000291        | 0.00000014  | 0.00043   | 0.0205   | 0.000000000075<br>6 | 0.00145     | 0.00000000000<br>000533 | 0.0338  | 0.0694  | 0.0206  | 0.0459  | 0.00709 |
| THRB.GP063_1<br>43_5402                               | 0.0819          | 0.0000946   | 0.76      | 0.0788   | 0.00574             | 0.0389      | 0.702                   | 3.4     | 3.27    | 4.14    | 3.97    | 2.27    |

|                           |                 |           |         |       |           |         |                |         |        |        |        |        |
|---------------------------|-----------------|-----------|---------|-------|-----------|---------|----------------|---------|--------|--------|--------|--------|
| THRB.GP063_4<br>16MC_5401 | 0.0000000000795 | 0.124     | 0.00201 | 0.179 | 0.0000134 | 0.0541  | 0.000000000248 | 0.0393  | 0.102  | 0.0569 | 0.121  | 0.0886 |
| UN13A.GP066_<br>1005_7420 | 0.00000302      | 0.0000154 | 0.0594  | 0.515 | 0.025     | 0.0258  | 0.00000205     | 0.0647  | 0.124  | 0.0938 | 0.136  | 0.0327 |
| VTNC.GP067_1<br>69_5301   | 0.00693         | 0.00105   | 0.838   | 0.407 | 0.0127    | 0.0281  | 0.000109       | 0.722   | 0.394  | 0.483  | 0.47   | 1.17   |
| VTNC.GP067_8<br>6_5421    | 0.145           | 0.00636   | 0.00109 | 0.746 | 0.0163    | 0.209   | 0.0427         | 0.814   | 0.641  | 1.28   | 0.641  | 0.47   |
| ZA2G.GP068_1<br>12_5420   | 0.000000866     | 0.686     | 0.232   | 0.578 | 0.0327    | 0.00101 | 0.000000392    | 0.00921 | 0.0195 | 0.0153 | 0.0238 | 0.0135 |
